# Supplementary material for: Synergistic effect between Pd and Re on Pd–Re/SBA-15 catalysts and their catalytic behavior in glycerol hydrogenolysis
Source: Royal Society of Chemistry journal article supplement (doi:10.1039/c6ra02758j), 2016-01-01
Supplement: c6ra02758j1.pdf [file c6ra02758j1.pdf]

## Electronic Supplementary Information

Table S1 The reuse of the 5Pd-5Re/SBA-15 in glycerol hydrogenolysis

| Cat.           | Condition                  | Conv.(%) | Select.(%)       |      |      |        |        |
|----------------|----------------------------|----------|------------------|------|------|--------|--------|
|                |                            |          | C <sub>1~2</sub> | 1-PO | 2-PO | 1,2-PD | 1,3-PD |
| 5Pd-5Re/SBA-15 | Fresh(H <sub>2</sub> -250) | 40.7     | 5.2              | 24.6 | 2.1  | 59.9   | 8.2    |
| 5Pd-5Re/SBA-15 | Spent                      | 9.3      | 2.9              | 21.6 | 1.3  | 62.5   | 11.8   |
| 5Pd-5Re/SBA-15 | Spent*                     | 28.8     | 6.5              | 19.9 | 3.0  | 60.8   | 9.8    |

Reaction conditions: 0.15 g Pd catalyst, 40% Glycerol aqueous 10 mL, 200 °C, 8 MPa H<sub>2</sub>, 18 h, 700 rpm.

\*: spent catalyst calcined at 500 °C following by reduced at 250 °C.

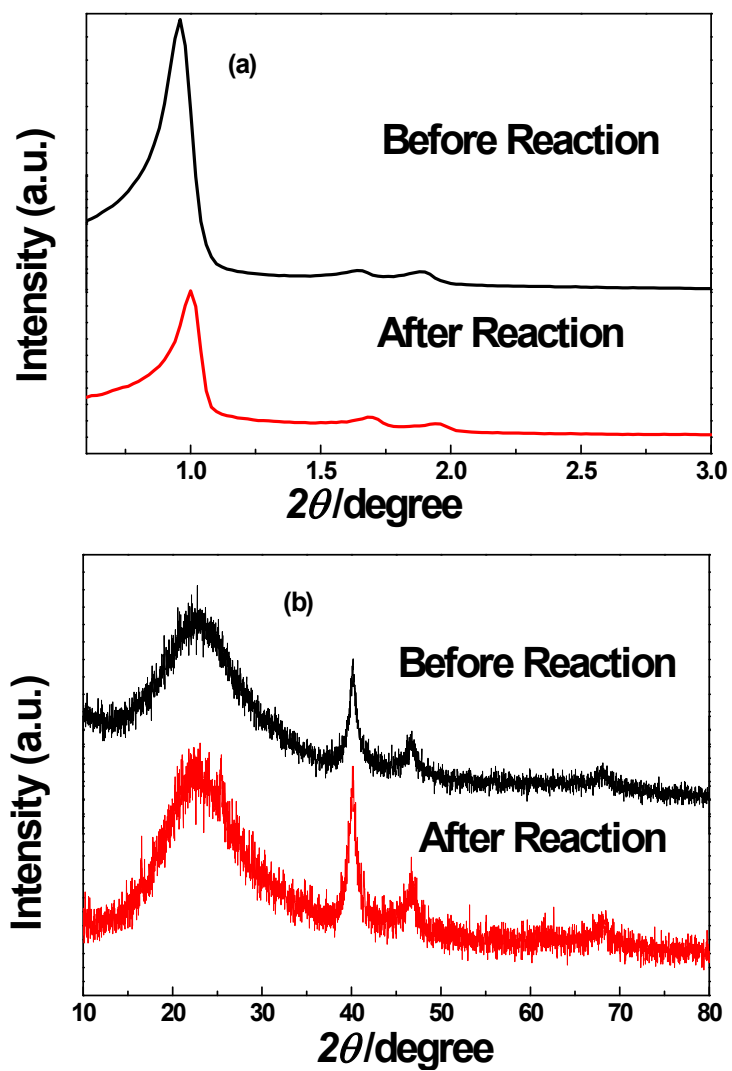

Fig. S1 XRD patterns of 5Pd-5Re/SBA-15 after reaction (a) small angle XRD (b) wide angle XRD

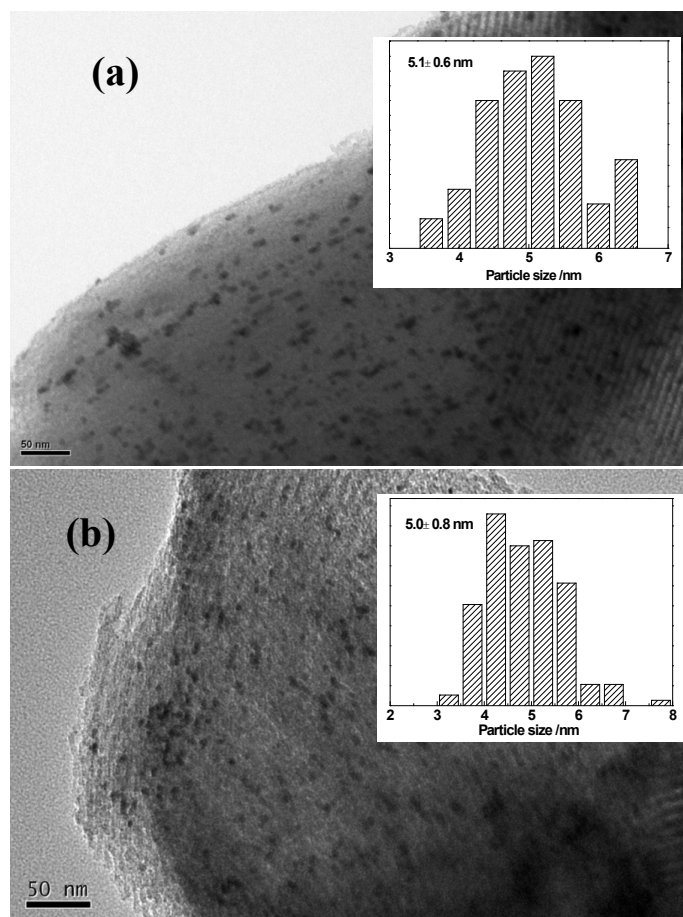

Fig. S2 TEM images of 5Pd-5Re/SBA-15 catalyst (a) Fresh (b) Spent

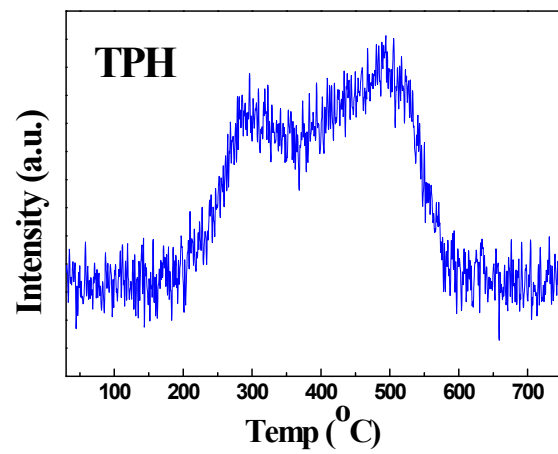

Fig. S3 TPH profile of spent 5Pd-5Re/SBA-15

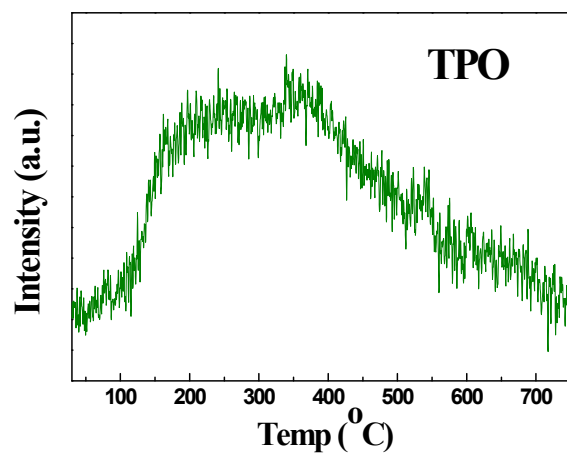

Fig. S4 TPO profile of spent 5Pd-5Re/SBA-15
